# Supplementary material for: A new method for the enamination of 1,3-dicarbonyl compounds catalyzed by laccase in water
Source: Royal Society of Chemistry journal article supplement (doi:10.1039/c4ra02650k), 2014-01-01
Supplement: c4ra02650k1.pdf [file c4ra02650k1.pdf]

## A novel method for the enamination of 1,3-dicarbonyl compounds catalyzed by laccase in water

Hong Zhang,<sup>a,d</sup> Zhi Wang,<sup>a,b,#</sup> Chunyu Wang,<sup>c</sup> Haoran Wang,<sup>a,b</sup> Tiexin Cheng,<sup>\*d</sup> Lei Wang<sup>\*a,b</sup>

<sup>a</sup> Key Laboratory of Molecular Enzymology and Engineering of Ministry of Education, Jilin University, Changchun 130023, P R China;

<sup>b</sup> College of life science, Jilin University, Changchun 130023, P R China;

<sup>c</sup> State key laboratory of supramolecular structure and materials, Jilin University, Changchun 130023, P R China;

<sup>d</sup> College of Chemistry, Jilin University, Changchun 130023, P R China;

### Supporting Information

#### 1 Materials

*Rhus vernicifera* laccase, *Trametes versicolor* laccase, *Trametes villosa* laccase and Bovine serum albumin used in this study were purchased from Sigma (Beijing, China). These enzymes were used for enzymatic reaction without further purification. All the chemical reagents were purchased from Shanghai Chemical Reagent Company (Shanghai, China). Commercially available reagents and solvents were used without further purification. The conversions were monitored by HPLC system (Agilent 1100) or GCsystem (Shimadzu 14B). <sup>1</sup>H-NMR spectra were recorded on an Inova 500 (1H, 500 MHz) spectrometer.

2 Determination of laccase activity according to reference (RSC Adv., 2013, 3, 19259–19263): A 0.1 M solution of ABTS (0.3 mL) in 0.01 M acetate buffer (pH = 4.5) was diluted with 0.01 M acetate buffer (2.6 mL, pH = 4.5) and treated with a solution of laccase in the same buffer (0.1mL). The change in absorption was followed via UV/Vis-spectroscopy ( $\lambda = 414$  nm). One unit was defined as the amount of laccase (*Trametes versicolor*, Sigma) that converts 1 mmol of ABTS per minute at pH = 4.5 at r.t..

| Laccase                            | Specific Activity |
|------------------------------------|-------------------|
| <i>Rhus vernicifera</i> laccase    | 55U/mg            |
| <i>Trametes versicolor</i> laccase | 18U/mg            |
| <i>Trametes villosa</i> laccase    | 30U/mg            |

#### 3 <sup>1</sup>H-NMR data of compounds 1-11

1. <sup>1</sup>H NMR (500 MHz, CDCl<sub>3</sub>)  $\delta$  10.84 (s, 1H), 4.93 (s, 1H), 3.21 (dd,  $J = 13, 6.5$  Hz, 2H), 1.97 (s, 3H), 1.90 (s, 3H), 1.55 (dd,  $J = 7.0, 14.5$  Hz, 2H), 1.40 (dd,  $J = 7.5, 15$ Hz, 2H), 0.92 (t,  $J = 7.0$  Hz, 3H).

2. <sup>1</sup>H NMR (500 MHz, CDCl<sub>3</sub>)  $\delta$  12.47 (s, 1H), 7.34 (m, 2H), 7.19 (t,  $J = 7.0$  Hz, 1H), 7.11 (d,  $J = 8.0$  Hz, 2H), 5.19 (s, 1H), 2.10 (d,  $J = 2.5$  Hz, 3H), 1.99 (d,  $J = 2.0$  Hz, 3H).

3. <sup>1</sup>H NMR (500 MHz, CDCl<sub>3</sub>)  $\delta$  5.07 (s, 1H), 3.24 (t,  $J = 7.5$  Hz, 4H), 2.53 (s, 3H), 2.08 (s, 3H), 1.57 (m, 4H), 1.35 (m, 4H), 0.97 (t,  $J = 7.0$  Hz, 6H).

4.  $^1\text{H}$  NMR (500 MHz,  $\text{CDCl}_3$ )  $\delta$  10.97 (s, 1H), 4.89 (s, 1H), 3.35 (s, 1H), 1.96 (s, 3H), 1.92 (s, 3H), 1.83 (s, 2H), 1.74 (s, 2H), 1.56 (s, 1H), 1.30 (m, 5H).
5.  $^1\text{H}$  NMR (500 MHz,  $\text{CDCl}_3$ )  $\delta$  10.87 (s, 2H), 4.95 (s, 2H), 3.23 (q,  $J = 6.5, 13$  Hz, 4H), 1.99 (s, 6H), 1.91 (s, 6H), 1.60 (m, 4H), 1.42 (m, 4H).
6.  $^1\text{H}$  NMR (500 MHz,  $\text{CDCl}_3$ )  $\delta$  11.37 (s, 1H), 4.90 (s, 1H), 2.06 (s, 3H), 1.99 (s, 3H), 1.41 (s, 9H).
7.  $^1\text{H}$  NMR (500 MHz,  $\text{CDCl}_3$ )  $\delta$  12.14 (s, 1H), 6.89 (d,  $J = 8.0$  Hz, 2H), 6.79 (d,  $J = 8.0$  Hz, 1H), 5.09 (s, 1H), 2.02 (s, 3H), 1.93 (s, 3H).
8.  $^1\text{H}$  NMR (500 MHz,  $\text{CDCl}_3$ )  $\delta$  10.00 (s, 1H), 6.87 (d,  $J = 8.5$  Hz, 2H), 6.79 (d,  $J = 8.5$  Hz, 2H), 4.65 (s, 1H), 4.15 (q,  $J = 7.0, 14$  Hz, 2H), 1.86 (s, 3H), 1.28 (t,  $J = 7.5$  Hz, 3H).
9.  $^1\text{H}$  NMR (500 MHz,  $\text{CDCl}_3$ )  $\delta$  8.56 (s, 1H), 4.43 (s, 1H), 4.08 (q,  $J = 7.0, 14$  Hz, 2H), 3.2 (dd,  $J = 7.0, 13$  Hz, 2H), 1.91 (s, 3H), 1.55 (m, 2H), 1.40 (m, 2H), 1.25 (t,  $J = 7.0$  Hz, 3H), 0.93 (t,  $J = 7.5$  Hz, 3H).
10.  $^1\text{H}$  NMR (500 MHz,  $\text{CDCl}_3$ )  $\delta$  8.45 (s, 1H), 4.43 (s, 1H), 3.61 (s, 3H), 3.19 (dd,  $J = 7.5, 14$  Hz, 2H), 1.93 (s, 3H), 1.54 (m, 2H), 1.45 (m, 2H), 0.92 (t,  $J = 7.3$  Hz, 3H).
11.  $^1\text{H}$  NMR (500 MHz,  $\text{CDCl}_3$ )  $\delta$  11.50 (s, 1H), 7.86 (m, 2H), 7.38 (m, 3H), 5.65 (s, 1H), 3.31 (q,  $J = 7.0, 13$  Hz, 2H), 2.05 (s, 3H), 1.63 (m, 2H), 1.45 (m, 2H), 0.96 (t,  $J = 7.0$  Hz, 3H).
